# Supplementary material for: Botulinum Neurotoxin Devoid of Receptor Binding Domain Translocates Active Protease
Source: PubMed Central journal article supplement (PMC2596314; doi:10.1371/journal.ppat.1000245), 2008-12-19

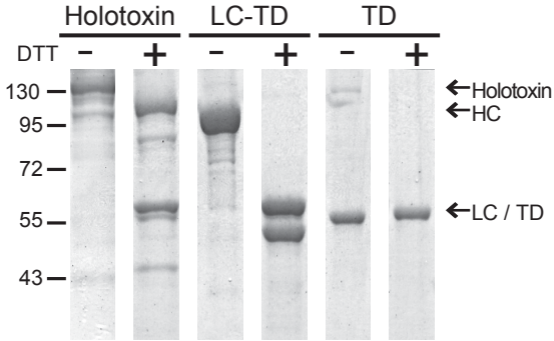

Supplement: ppat.1000245.s001.pdf [file ppat.1000245.s001.pdf]
