# Supplementary material for: Botulinum Neurotoxin Devoid of Receptor Binding Domain Translocates Active Protease
Source: PubMed Central journal article supplement (PMC2596314; doi:10.1371/journal.ppat.1000245), 2008-12-19
Supplement: ppat.1000245.s002.pdf [file ppat.1000245.s002.pdf]

1 2 3 4

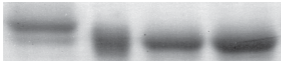

← SNAP-25  
← Cleaved SNAP-25
